# Supplementary material for: Synthesis of [68Ga]Ga-PSMA-11 using the iMiDEV™ microfluidic platform
Source: Royal Society of Chemistry journal article supplement (doi:10.1039/d3re00038a), 2023-01-01
Supplement: d3re00038a1.pdf [file d3re00038a1.pdf]

## Supporting Information

### Synthesis of [ $^{68}\text{Ga}$ ]Ga-PSMA-11 using amide™ microfluidic platform

Olga Ovdiichuk,<sup>\*a</sup> Quentin Béen,<sup>a</sup> Laurent Tanguy,<sup>b</sup> Charlotte Collet<sup>a,c</sup>

<sup>a</sup> Nancyclotep, Molecular Imaging platform, 54500 Vandoeuvre-les-Nancy, FRANCE

<sup>b</sup> PMB-Alcen, France

<sup>c</sup> Université de Lorraine, Inserm, IADI, F-54000 Nancy, France

\* Correspondence: o.ovdiichuk@nancyclotep.com (OO)

#### Table of contents:

**Table 1** - Schematic representation of the steps used for the production of [ $^{68}\text{Ga}$ ]Ga-PSMA-11 on the iMiDEV cassette **S1-S5**

**Table 2.** Details on manufacturing changes in beads filling of different batches of cassettes iMiDEV **S6**

**Figure 1.** Distribution of cassettes batches as function of their bead's density and trapping flowrate in R1 chamber: top image – cassettes with R1 filled with PS-H+ resin; bottom image – cassettes with R1 filled with MCX beads **S6-S7**

**Table 3.** Results of pH measurements for mixtures of sodium acetate solution 0.8M and acidified sodium chloride solution 3M/5M prepared and measured off-cassette **S7**

**Figure 2.** Variation of the mixture pH as a function of the eluent composition **S8**

**Figure 3.** Cerenkov and white light images obtained after the [ $^{68}\text{Ga}$ ]Ga-PSMA-11 production using the cassette with formulation in R4 (a, b) and in R3 (c, d) chambers **S8**

**Figure 4.** Overlaid radiochromatograms of [ $^{68}\text{Ga}$ ]Ga-PSMA-11, demonstrating its stability within 4 h from the final product delivery **S9**

**Table 1.** : Schematic representation of the steps used for the production of [ $^{68}\text{Ga}$ ]Ga-PSMA-11 on the iMiDEV cassette

- Vial A (4 mL): 5 M NaCl (130  $\mu\text{L}$ ) + 0.1 M HCl (220  $\mu\text{L}$ ) for MCX
- Vial C (0.3 mL): 0.8 M AcONa (140  $\mu\text{L}$ ) + PSMA-11 (10  $\mu\text{L}$ )
- Vial E (4 mL): empty
- Vial F (4 mL): EtOH (0.8 mL)
- Vial G (15 mL):  $\text{H}_2\text{O}$  (4 mL)
- Vial H (15 mL): NaCl 0,9% (8 mL)
- External Vial with isotope (10 mL):  $^{68}\text{GaCl}_3$  (1.5 mL)
- Collection vial (15 mL): empty

|   |                                                                             | Radiolabelling steps |
|---|-----------------------------------------------------------------------------|----------------------|
| 1 | Reverse Injection of isotope on R1 filled with PSH+ or MCX<br>Delay : 120 s |                      |
| 2 | Drying R1 with $\text{N}_2$ flow (Vial E)<br>Delay : 60 s                   |                      |

|          |                                                                                                                                                                       |                                                                                      |
|----------|-----------------------------------------------------------------------------------------------------------------------------------------------------------------------|--------------------------------------------------------------------------------------|
| <p>3</p> | <p>Pre-elution of <math>^{68}\text{Ga}</math> (R1) with eluant (Vial A) to MFV* 11 (gas evacuation through the vent)<br/> Delay : 5 s followed by closing all MFV</p> | 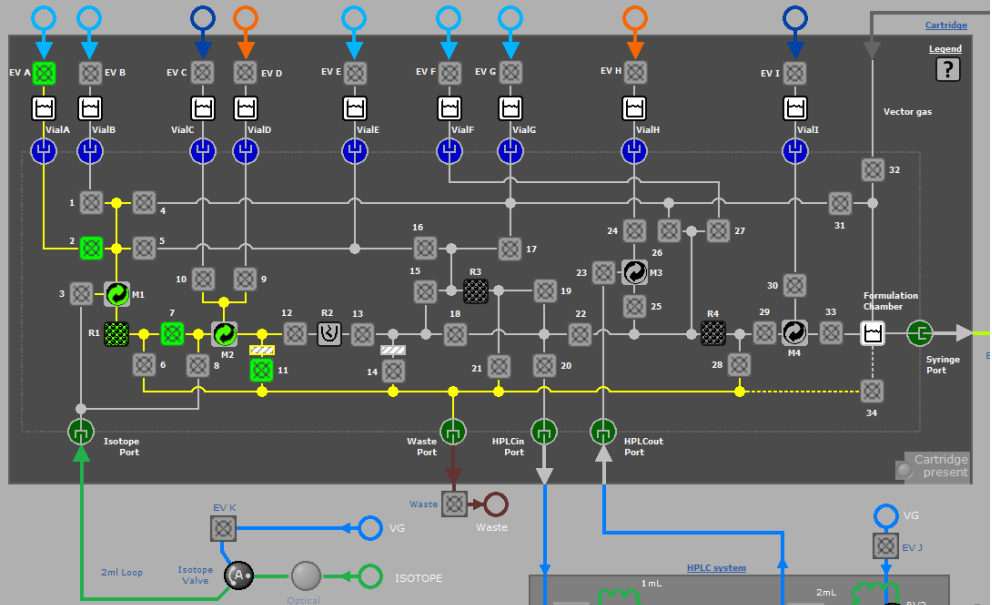   |
| <p>4</p> | <p>Sending precursor (Vial C) to M2<br/> Delay: 1 s</p>                                                                                                               | 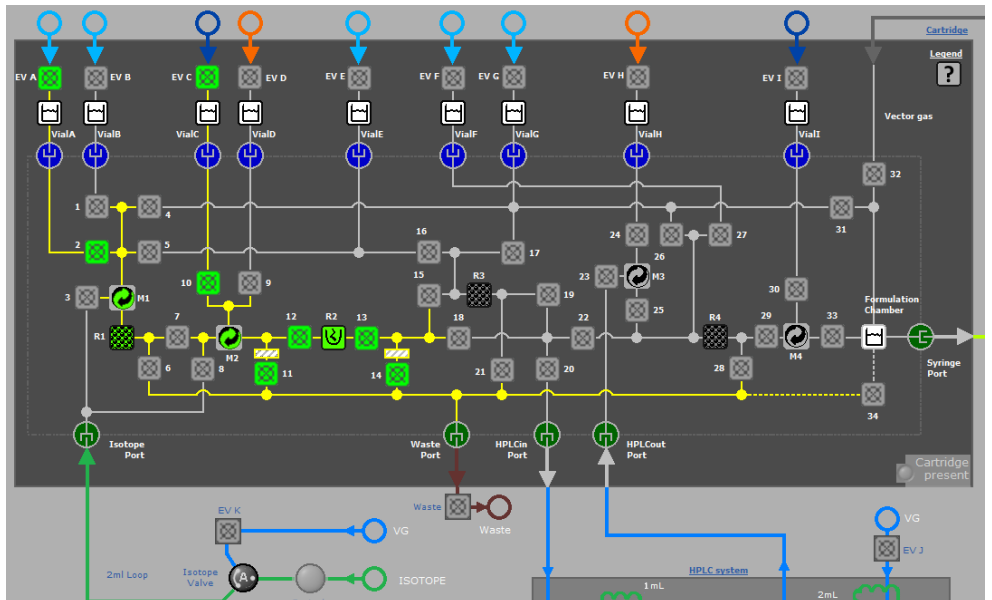  |
| <p>5</p> | <p>Simultaneous injection Vial A + Vial C to R2<br/> Delay : 15 s (gas evacuation through the vents)</p>                                                              | 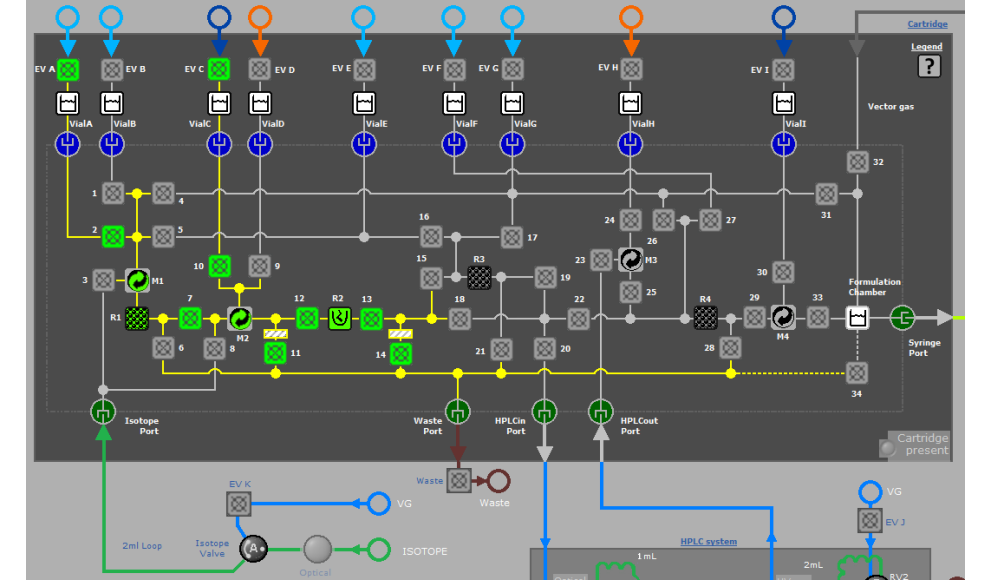 |

|   |                                                                                                 |                                                                                      |
|---|-------------------------------------------------------------------------------------------------|--------------------------------------------------------------------------------------|
| 6 | <p>Labelling at 95 °C (set temperature)<br/> Delay : 60 s – heating<br/> and 90 s - cooling</p> | 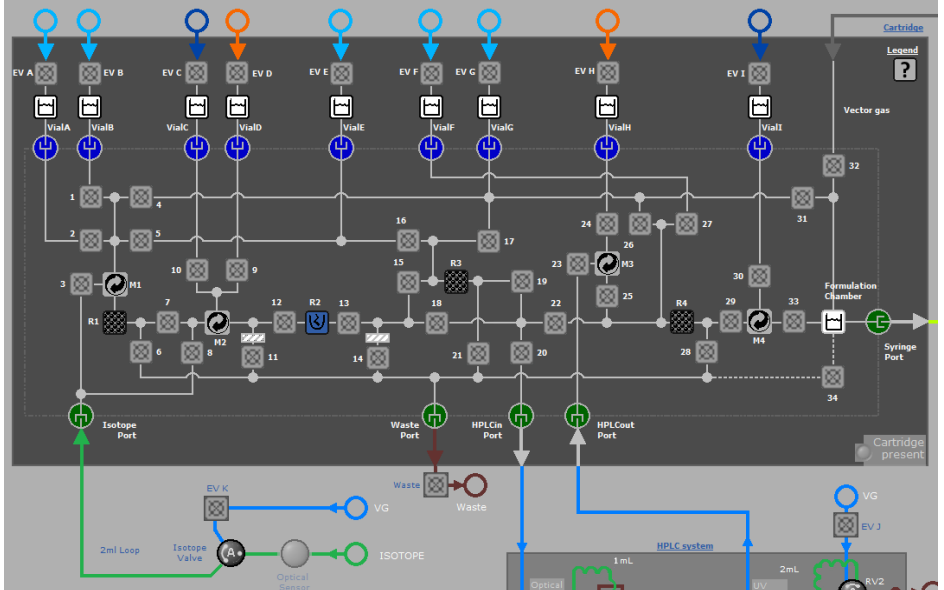   |
| 7 | <p>Emptying Vial A to Waste<br/> Delay : 30 s</p>                                               | 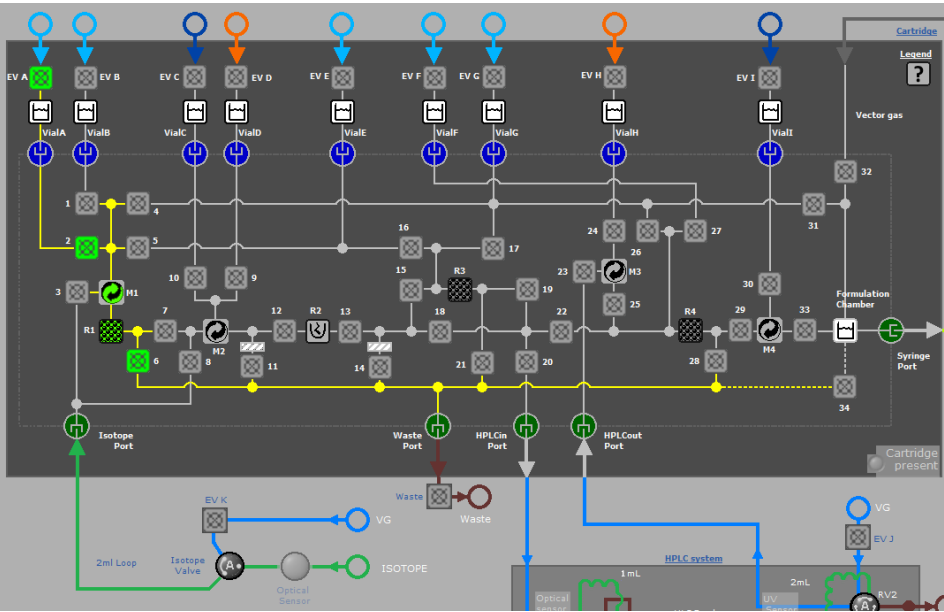  |
| 8 | <p>Sending the reaction crude from R2 to R4 with Vial A<br/> Delay: 60 s</p>                    | 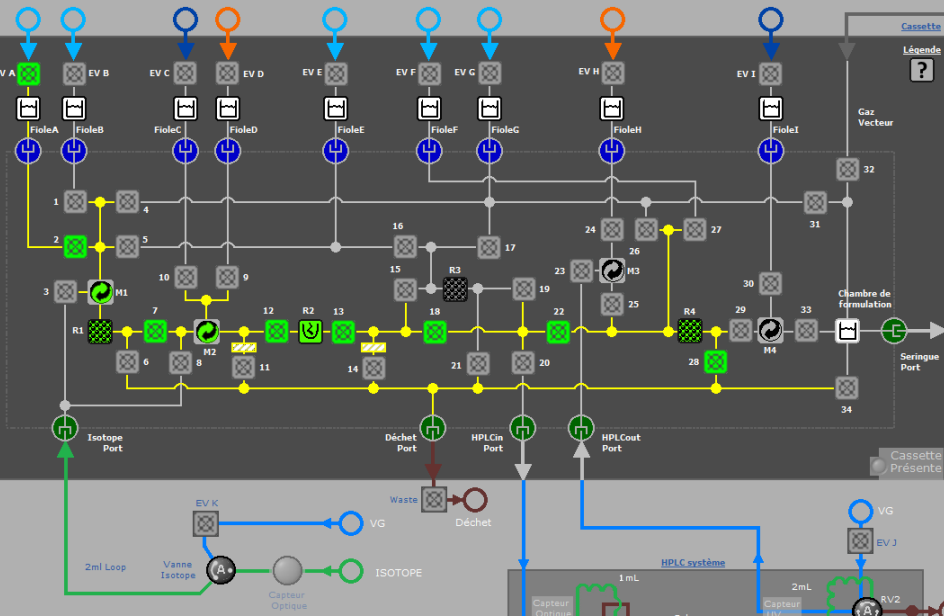 |

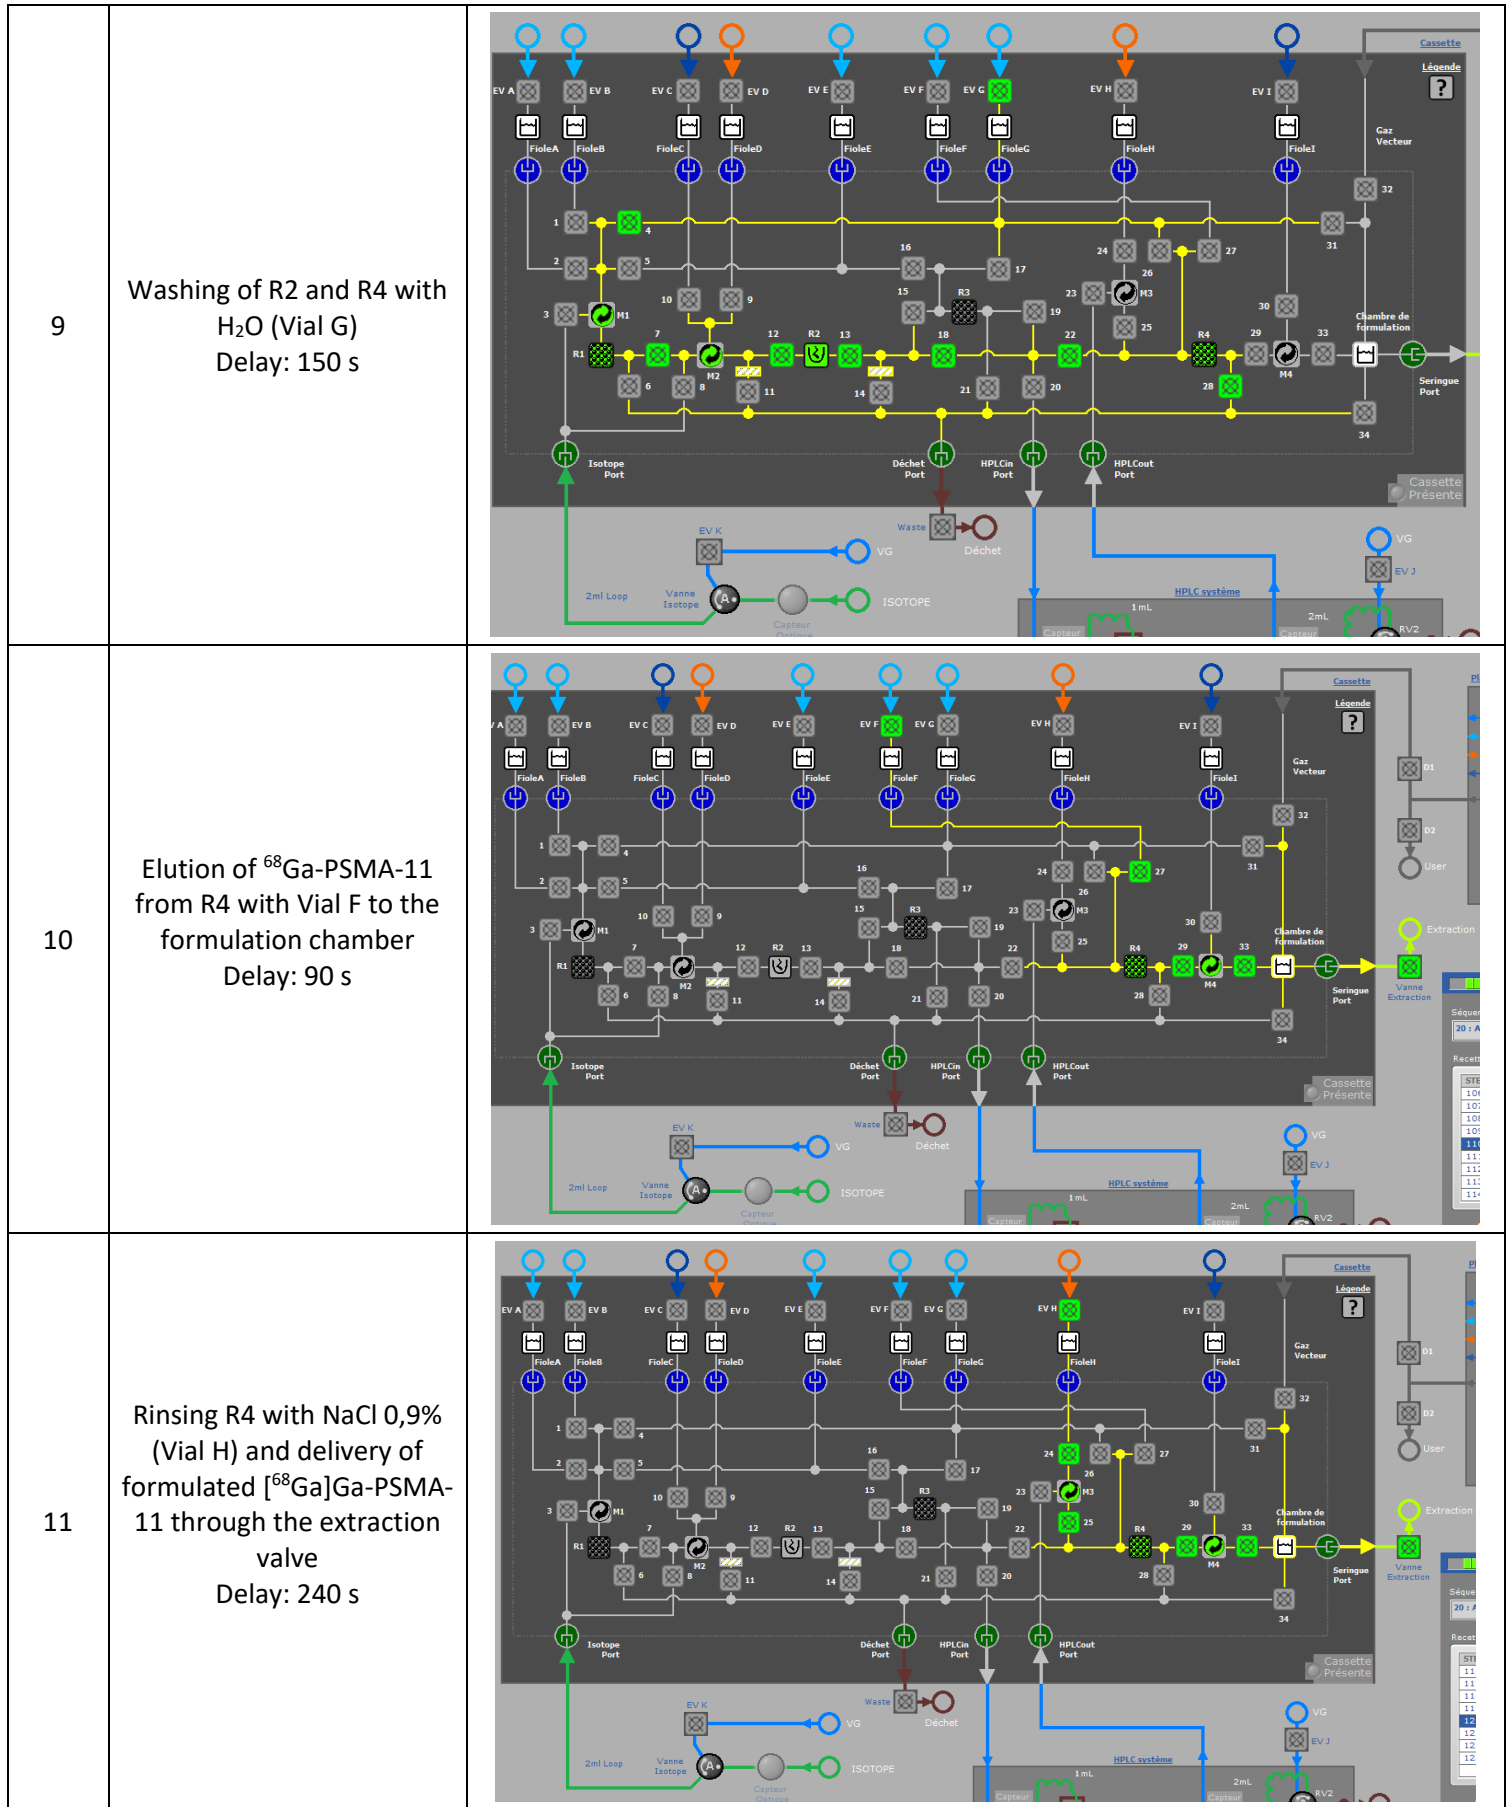

Open MFVs and EVs represented in green.

**Table 2.** Details on manufacturing changes in beads filling of different batches of cassettes iMiDEV

| Details on manufacturing changes | Beads filling*                                                                                                   |
|----------------------------------|------------------------------------------------------------------------------------------------------------------|
| Batch < 33                       | Manual filling of the beads, some voids are observable. Lack of stability and repetability                       |
| Batch 33 to 48                   | Automated filling of the chamber with vibrations, filling cycles and no control                                  |
| Batch > 49*                      | Automated filling of the chamber with vibrations, filling cycles and control on the flowrate through the chamber |

\*The beads are filled during cassette manufacturing by gravity, then pushed with compressed air, and helped to settle with ultrasonic vibration before final testing, packaging, and gamma irradiation.

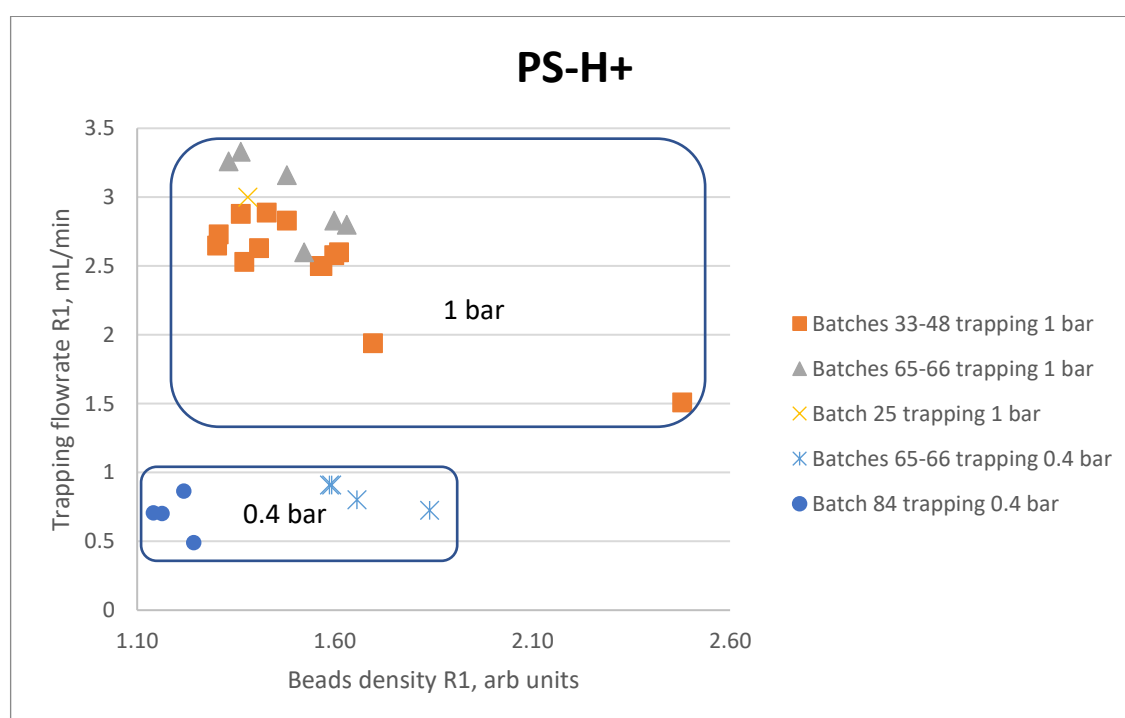

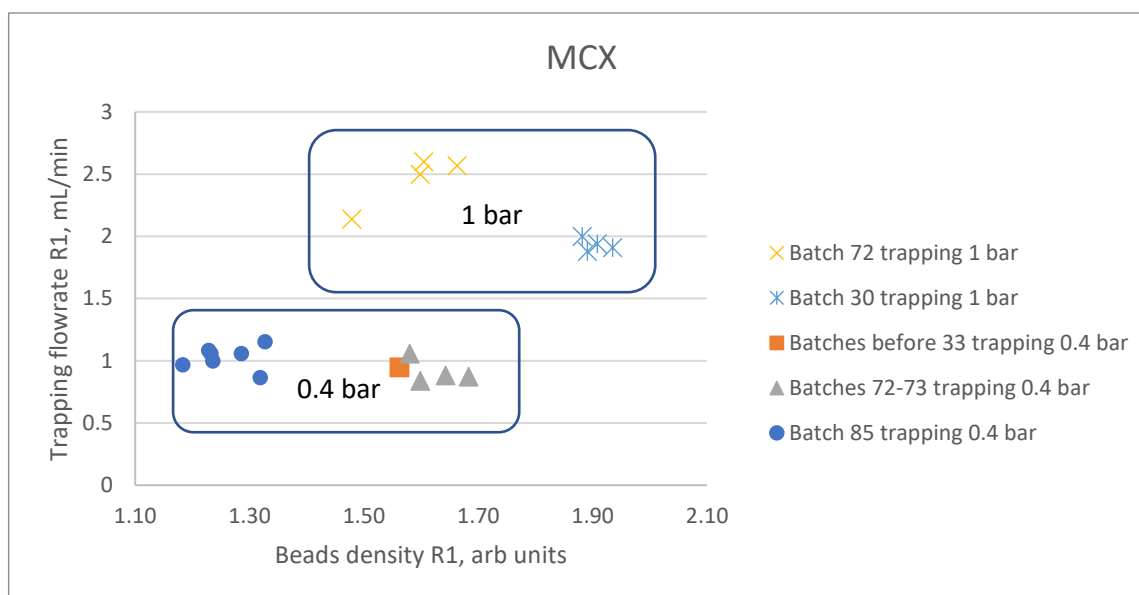

**Figure 1.** Distribution of cassettes batches as function of their bead's density and trapping flowrate in R1 chamber: top image – cassettes with R1 filled with PS-H+ resin; bottom image – cassettes with R1 filled with MCX beads.

**Table 3.** Results of pH measurements for mixtures of sodium acetate solution 0.8M and acidified sodium chloride solution 3M/5M prepared and measured off-cassette; the A+B combinations providing the good pH for complexation yields are highlighted in green and blue.

| Volume A<br>(NaCl+HCl) | Volume B<br>(0,8M AcONa) | pH A+B (A : 3M NaCl<br>+ 2.5% HCl <sub>30%</sub> ) | pH A+B (A : 5M<br>NaCl+0,1M HCl) |
|------------------------|--------------------------|----------------------------------------------------|----------------------------------|
| 0%                     | 100%                     | 7,7                                                | 7,87                             |
| 10%                    | 90%                      | 5,99                                               | 6,67                             |
| 20%                    | 80%                      | 5,51                                               | 6,27                             |
| 25%                    | 75%                      | 5,36                                               | 6,12                             |
| 30%                    | 70%                      | 5,24                                               | 6                                |
| <b>40%</b>             | <b>60%</b>               | <b>4,95</b>                                        | 5,76                             |
| <b>45%</b>             | <b>55%</b>               | <b>4,82</b>                                        | 5,61                             |
| <b>50%</b>             | <b>50%</b>               | <b>4,65</b>                                        | 5,5                              |
| <b>55%</b>             | <b>45%</b>               | <b>4,55</b>                                        | 5,39                             |
| <b>60%</b>             | <b>40%</b>               | <b>4,38</b>                                        | <b>5,25</b>                      |
| <b>70%</b>             | <b>30%</b>               | 3,9                                                | <b>4,99</b>                      |
| <b>80%</b>             | <b>20%</b>               | 1,15                                               | <b>4,65</b>                      |
| 90%                    | 10%                      | 0,39                                               | 3,71                             |
| 100%                   | 0%                       | 0,14                                               | 0,92                             |

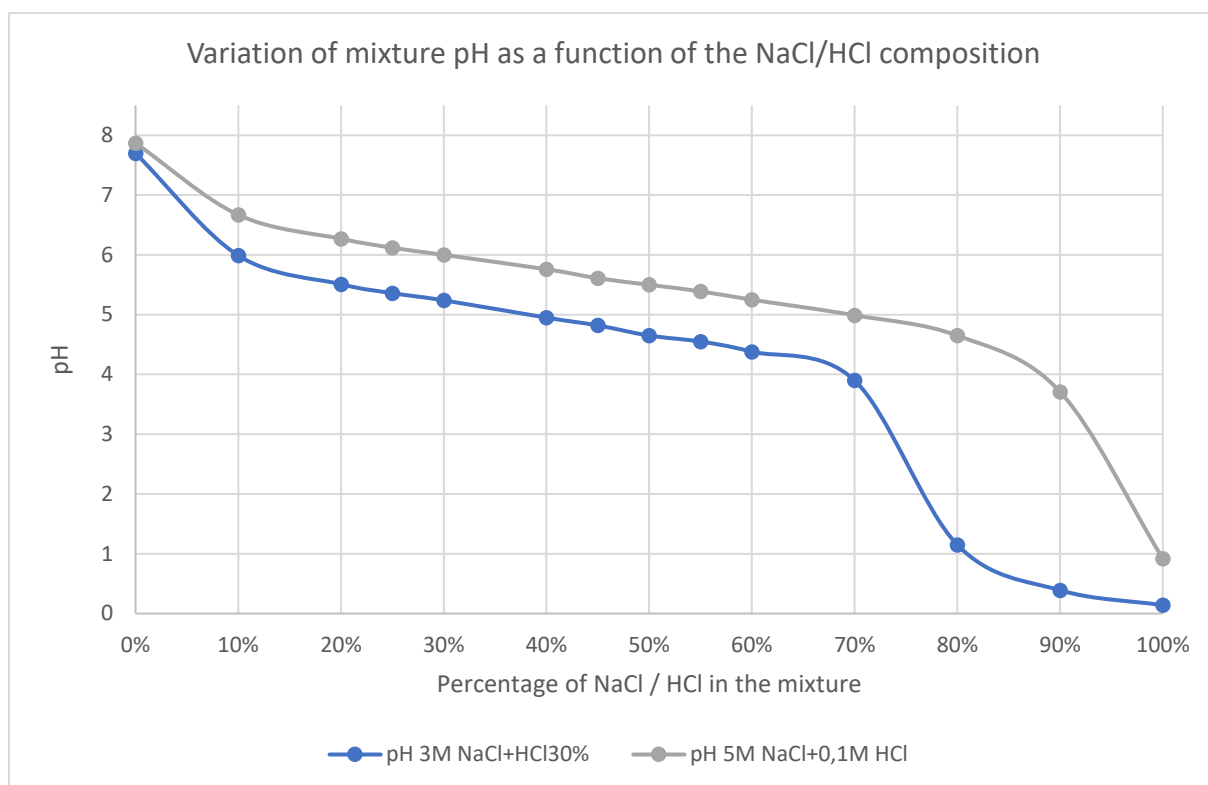

**Figure 2.** Variation of the mixture pH as a function of the eluent composition

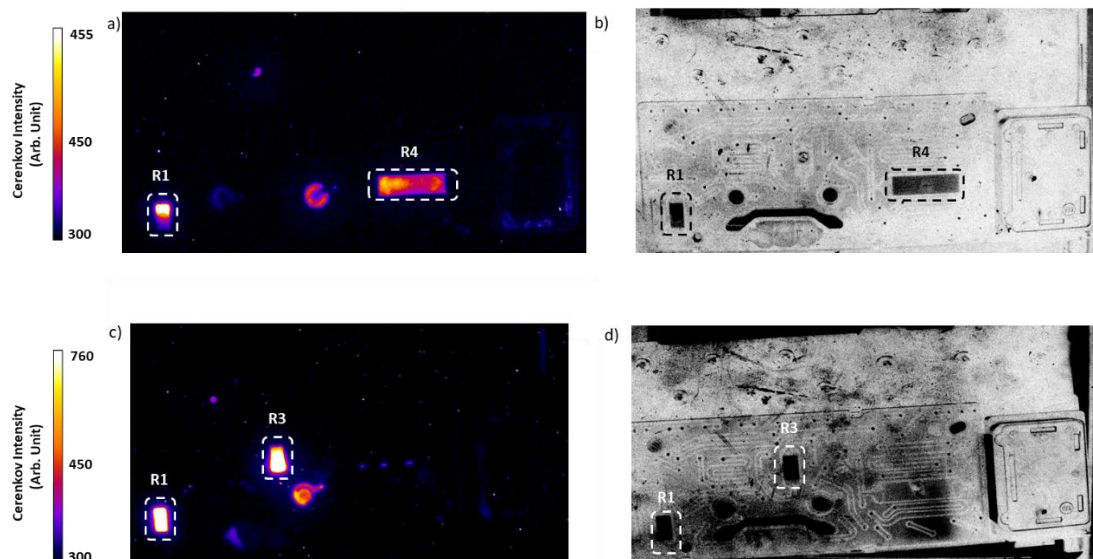

**Figure 3.** Cerenkov and white light images obtained after the  $[^{68}\text{Ga}]\text{Ga-PSMA-11}$  production using the cassette with formulation in R4 (a, b) and in R3 (c, d) chambers.

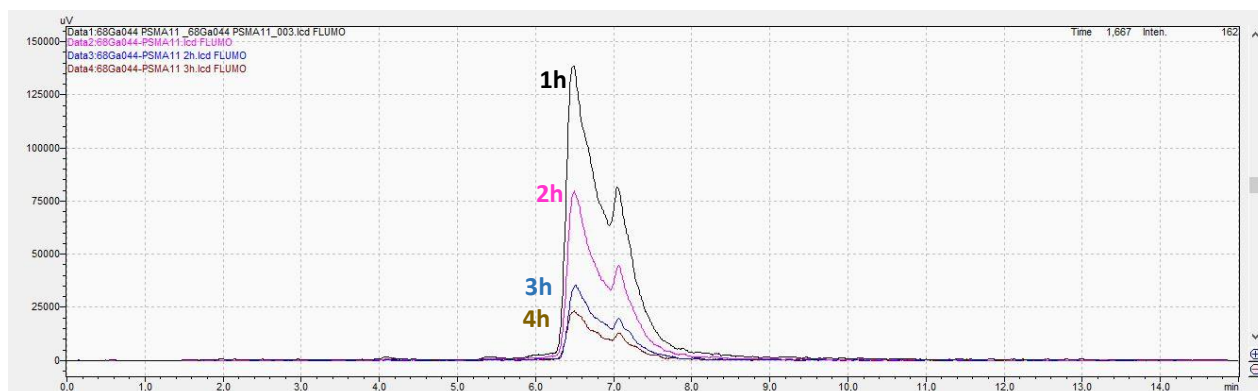

**Figure 4.** Overlaid radiochromatograms of [ $^{68}\text{Ga}$ ]Ga-PSMA-11, demonstrating its stability within 4 h from the final product delivery.
